# Supplementary material for: Nitrogen modulated NiMoO4 with enhanced activity for the electrochemical oxidation of 5-hydroxymethylfurfural to 2,5-furandicarboxylic acid
Source: Royal Society of Chemistry journal article supplement (doi:10.1039/d1cy00786f), 2021-01-01
Supplement: d1cy00786f1.pdf [file d1cy00786f1.pdf]

## Supporting Information

### **Nitrogen modification of NiMoO<sub>4</sub> with enhanced activity for the electrochemical oxidation of 5-hydroxymethylfurfural to 2,5-furandicarboxylic acid**

Wei Wang, Min Wang\*

Zhang Dayu School of Chemistry, Dalian University of Technology, Dalian, 116024

Liaoning, P. R. China

\*Correspondence to: wangmin@dlut.edu.cn

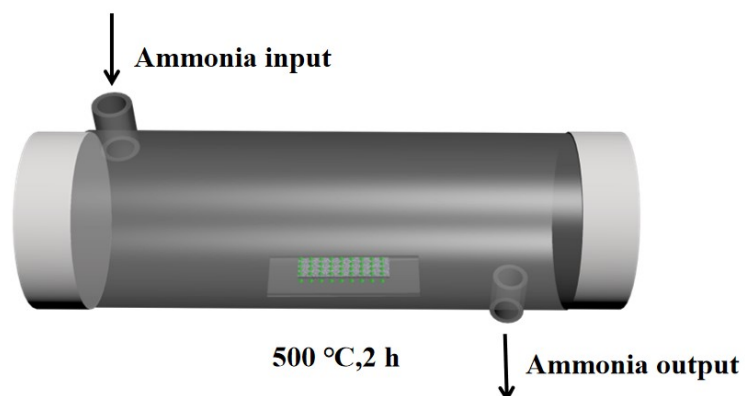

**Figure S1** Schematic diagram of the ammoniation of N-NiMoO<sub>4</sub> catalyst.

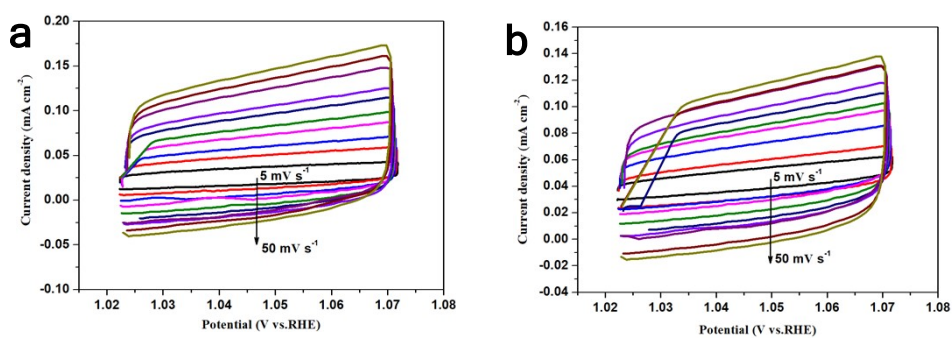

**Figure S2** Cyclic voltammety curves of N-NiMoO<sub>4</sub>, NiMoO<sub>4</sub> with different sweep speeds

**Table S1** Effects of different calcination time on nitrogen content

| Calcination time(h) | Nitrogen content(%) |
|---------------------|---------------------|
| 1                   | 3.23                |
| 2                   | 3.99                |
| 12                  | 4.56                |

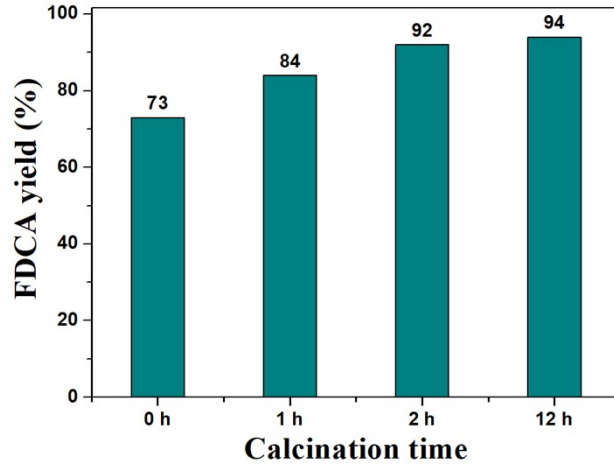

Figure S3 Catalytic activity of catalysts at different calcination times.

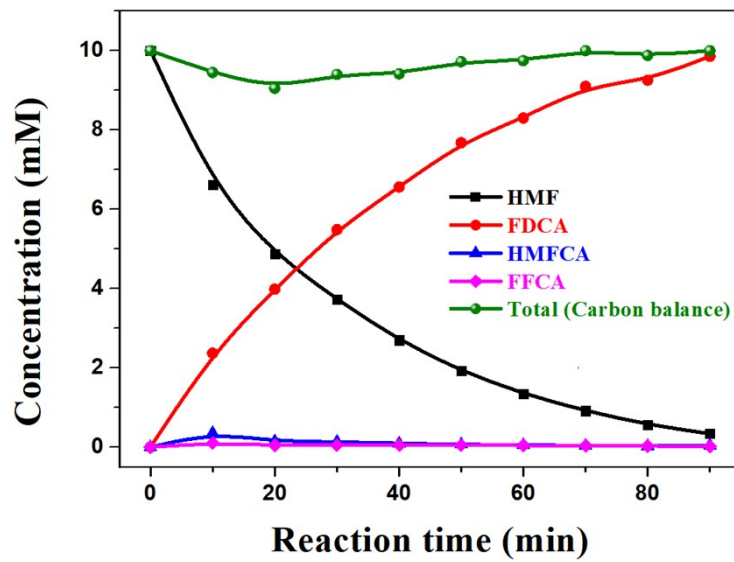

Figure S4 The profiles of the reaction intermediates.

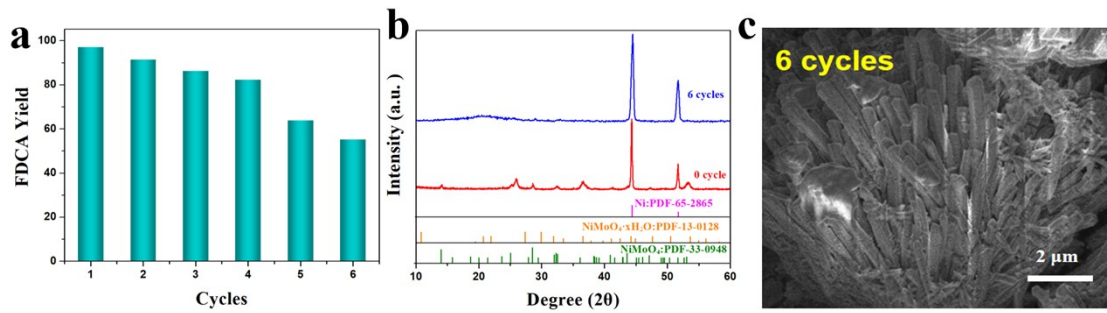

Figure S5 Cyclic experiment and corresponding XRD, SEM comparison.
